# Supplementary material for: Optimizing the influential variables for enhanced photocatalytic performance of synergistic Ag–TiO 2 /FLG heterojunctions towards rapid mineralization of emerging polystyrene microplastics in water
Source: Royal Society of Chemistry journal article supplement (doi:10.1039/d5cy00792e), 2025-01-01
Supplement: d5cy00792e1.pdf [file d5cy00792e1.pdf]

# Optimizing The Influential Variables for Enhanced Photocatalytic Performance of Synergistic Ag-TiO<sub>2</sub>/FLG Heterojunctions Towards Rapid Mineralization of Emerging Polystyrene Microplastics in Water

Bhagyalakshmi Chinnam, and Ramya Araga\*

*Department of Chemical Engineering, National Institute of Technology Warangal,  
Telangana, India- 506004.*

## \*Corresponding author:

Dr. Ramya Araga,

Department of Chemical Engineering,

National Institute of Technology, Warangal,

Telangana, India- 506004.

Email: [ramyaaraga@nitw.ac.in](mailto:ramyaaraga@nitw.ac.in)

Contact No: +91 870-246-2620

ORCID ID: 0000-0002-2970-8323

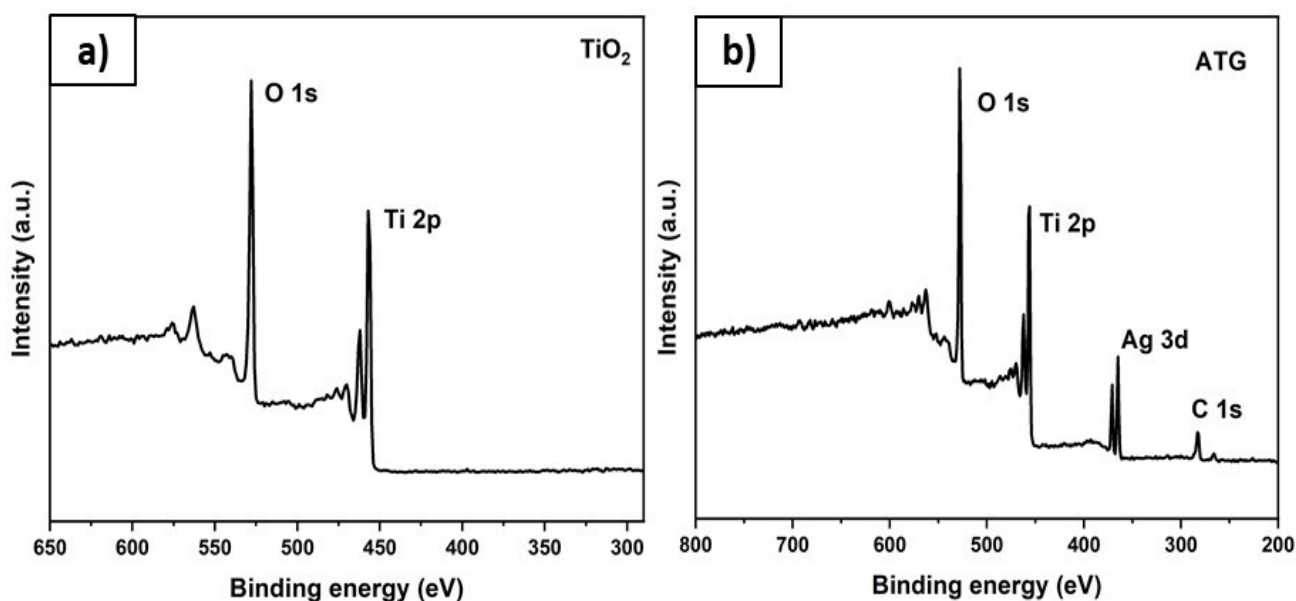

**Fig. S1** XPS survey spectra of a) TiO<sub>2</sub>; and b) ATG

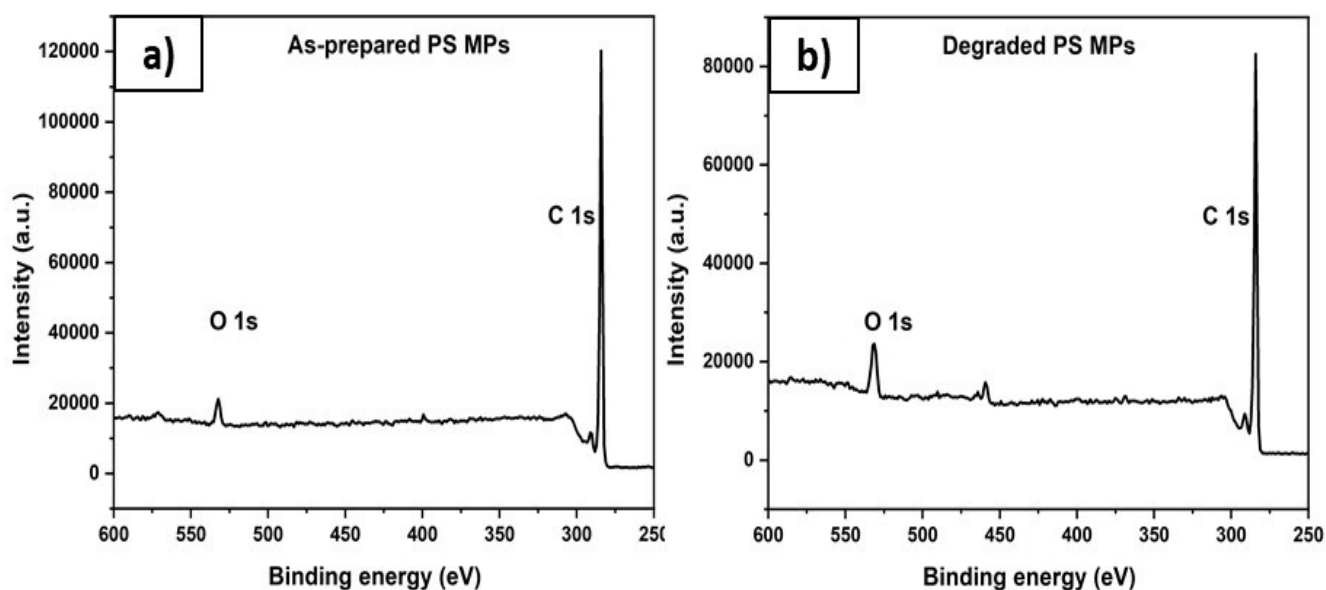

**Fig. S2** XPS survey spectra of a) as-prepared; and b) Degraded PS MPs

**Table S1** Intermediate compounds of the photocatalytic degradation of PS MPs after 120 h

| Potential intermediates                   | Structure                               | Acquisition time (min) | Concentration (%) | Toxicity level as per MSDS |
|-------------------------------------------|-----------------------------------------|------------------------|-------------------|----------------------------|
| Oxalic acid, butyl propyl ester           | <chem>CCCCOC(=O)C(=O)OCCC</chem>        | 8.9873                 | 0.1               | Mild                       |
| Butanal, 3,3-dimethyl-2-oxo-, hemihydrate | <chem>CC(C)(C)C(=O)C=O</chem>           | 10.4439                | 0.27              | Non-toxic                  |
| Pivalic acid vinyl ester                  | <chem>CC(C)(C)C(=O)O/C=C</chem>         | 11.0047                | 0.03              | Mild                       |
| Oxalic acid, iso-hexyl pentyl ester       | <chem>CCCCCOC(=O)C(=O)OCC(C)CCCC</chem> | 13.3971                | 0.08              | Mild                       |

|                                                |                                                                                     |         |      |           |
|------------------------------------------------|-------------------------------------------------------------------------------------|---------|------|-----------|
| Pentane, 2,2-dimethyl-                         | 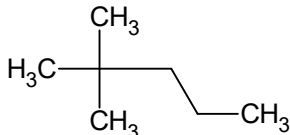   | 13.4736 | 0.07 | Toxic     |
| Undecane, 3,8-dimethyl-                        |    | 13.8305 | 1.26 | Mild      |
| Hexane, 3,3-dimethyl-                          |    | 13.9470 | 0.24 | Mild      |
| Ether, 3-butenyl propyl                        |    | 14.2711 | 0.09 | Mild      |
| 3-Nonanone, 2-methyl-                          |   | 14.3294 | 0.09 | Mild      |
| Ether, 3-butenyl pentyl                        |  | 14.5988 | 0.09 | Mild      |
| Undecane, 3,8-dimethyl-                        |  | 15.7932 | 1.23 | Mild      |
| Iso-valeraldehyde benzyl 3-methyl butyl acetal |  | 16.0445 | 0.07 | Mild      |
| Hexadecane, 2,6,11,15-tetramethyl-             |  | 16.2593 | 1.98 | Non-toxic |

|                                               |                                                                                     |         |      |           |
|-----------------------------------------------|-------------------------------------------------------------------------------------|---------|------|-----------|
| Octane, 2,6,6-trimethyl-                      | 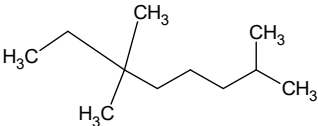   | 16.5179 | 0.1  | Non-toxic |
| Tridecane, 3-methyl-                          |    | 16.7728 | 0.64 | Non-toxic |
| n-Hexyl acrylate                              |    | 16.9767 | 0.05 | Mild      |
| 2-Ethylbutyric acid, tetrahydrofurfuryl ester |    | 16.7072 | 0.04 | Mild      |
| Tridecanol, 2-ethyl-2-methyl-                 |  | 18.0473 | 0.96 | Non-toxic |
| Octane, 2,7-dimethyl-                         |  | 18.8266 | 0.56 | Mild      |

---

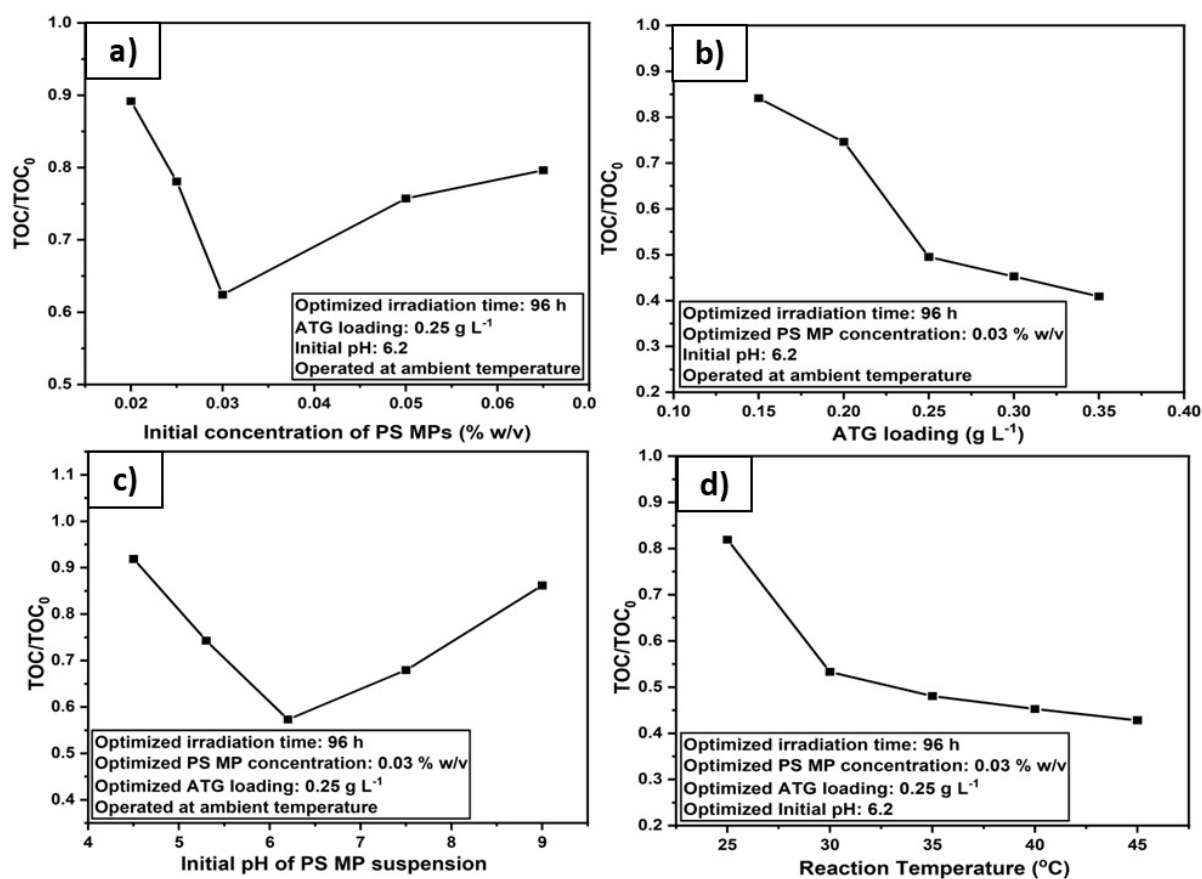

**Fig. S3** Partial mineralization of the PS MPs at different process conditions: a) Initial PS MP concentration; b) ATG loading; c) Initial pH; and d) Reaction temperature
